# Supplementary material for: Sterol derivative binding to the orthosteric site causes conformational changes in an invertebrate Cys-loop receptor
Source: eLife. 2023 Jul 3;12:e86029. doi: 10.7554/eLife.86029 (PMC10338036; doi:10.7554/eLife.86029)
Supplement: Figure 4—source data 1. [file elife-86029-fig4-data1.xlsx]

## Sheet: Alpo4_apo
cenxyz.cvec	radius	cen_line_D	sum{s/(area	point
-40.5116	4.90703	-23.6281	0.00165	(sampled)
-40.3866	4.81645	-23.4918	0.00337	(mid-point)
-40.2616	4.72705	-23.3555	0.00515	(sampled)
-40.1366	4.63893	-23.2199	0.007	(mid-point)
-40.0116	4.55205	-23.0844	0.00892	(sampled)
-39.8866	4.46744	-22.9488	0.01091	(mid-point)
-39.7616	4.38469	-22.8132	0.01298	(sampled)
-39.6366	4.30374	-22.6773	0.01513	(mid-point)
-39.5116	4.22446	-22.5415	0.01736	(sampled)
-39.3866	4.14794	-22.4061	0.01967	(mid-point)
-39.2616	4.07339	-22.2708	0.02207	(sampled)
-39.1366	4.00079	-22.1353	0.02455	(mid-point)
-39.0116	3.93054	-21.9997	0.02713	(sampled)
-38.8866	3.86215	-21.865	0.0298	(mid-point)
-38.7616	3.79595	-21.7302	0.03256	(sampled)
-38.6366	3.73482	-21.5936	0.03541	(mid-point)
-38.5116	3.67619	-21.4571	0.03836	(sampled)
-38.3866	3.61904	-21.3211	0.04139	(mid-point)
-38.2616	3.56482	-21.1852	0.04452	(sampled)
-38.1366	3.51449	-21.0497	0.04775	(mid-point)
-38.0116	3.46686	-20.9143	0.05106	(sampled)
-37.8866	3.4226	-20.7784	0.05445	(mid-point)
-37.7616	3.38121	-20.6426	0.05793	(sampled)
-37.6366	3.34345	-20.5069	0.06149	(mid-point)
-37.5116	3.30892	-20.3713	0.06513	(sampled)
-37.3866	3.27764	-20.2358	0.06883	(mid-point)
-37.2616	3.24971	-20.1002	0.0726	(sampled)
-37.1366	3.22623	-19.9643	0.07642	(mid-point)
-37.0116	3.20547	-19.8284	0.08029	(sampled)
-36.8866	3.18914	-19.6929	0.08421	(mid-point)
-36.7616	3.1765	-19.5575	0.08815	(sampled)
-36.6366	3.16749	-19.4218	0.09211	(mid-point)
-36.5116	3.16223	-19.2861	0.09609	(sampled)
-36.3866	3.16088	-19.1505	0.10008	(mid-point)
-36.2616	3.16334	-19.0149	0.10405	(sampled)
-36.1366	3.16951	-18.8792	0.10801	(mid-point)
-36.0116	3.17949	-18.7435	0.11195	(sampled)
-35.8866	3.19351	-18.6079	0.11585	(mid-point)
-35.7616	3.21107	-18.4723	0.11971	(sampled)
-35.6366	3.23203	-18.3365	0.12352	(mid-point)
-35.5116	3.25645	-18.2006	0.12727	(sampled)
-35.3866	3.28334	-18.0641	0.13096	(mid-point)
-35.2616	3.25334	-17.9276	0.13472	(sampled)
-35.1366	3.19896	-17.792	0.13861	(mid-point)
-35.0116	3.14779	-17.6564	0.14262	(sampled)
-34.8866	3.10007	-17.5209	0.14676	(mid-point)
-34.7616	3.05576	-17.3854	0.15103	(sampled)
-34.6366	3.01472	-17.249	0.1554	(mid-point)
-34.5116	2.97734	-17.1125	0.15989	(sampled)
-34.3866	2.9446	-16.9775	0.16448	(mid-point)
-34.2616	2.9156	-16.8425	0.16916	(sampled)
-34.1366	2.88955	-16.707	0.17393	(mid-point)
-34.0116	2.86742	-16.5715	0.17877	(sampled)
-33.8866	2.8503	-16.4353	0.18366	(mid-point)
-33.7616	2.83601	-16.2991	0.18861	(sampled)
-33.6366	2.82622	-16.1636	0.19359	(mid-point)
-33.5116	2.81995	-16.0281	0.1986	(sampled)
-33.3866	2.81923	-15.8925	0.2036	(mid-point)
-33.2616	2.82261	-15.757	0.2086	(sampled)
-33.1366	2.82932	-15.6214	0.21357	(mid-point)
-33.0116	2.84011	-15.4859	0.2185	(sampled)
-32.8866	2.85393	-15.3502	0.22338	(mid-point)
-32.7616	2.87148	-15.2145	0.22821	(sampled)
-32.6366	2.89505	-15.0782	0.23296	(mid-point)
-32.5116	2.92257	-14.9419	0.23761	(sampled)
-32.3866	2.95219	-14.8064	0.24218	(mid-point)
-32.2616	2.98558	-14.6708	0.24664	(sampled)
-32.1366	3.02505	-14.5351	0.25099	(mid-point)
-32.0116	3.06723	-14.3994	0.25522	(sampled)
-31.8866	3.11274	-14.2634	0.25933	(mid-point)
-31.7616	3.16087	-14.1274	0.26331	(sampled)
-31.6366	3.20715	-13.9906	0.26718	(mid-point)
-31.5116	3.14789	-13.8538	0.27119	(sampled)
-31.3866	3.08635	-13.7181	0.27537	(mid-point)
-31.2616	3.02781	-13.5824	0.27971	(sampled)
-31.1366	2.97267	-13.4479	0.28421	(mid-point)
-31.0116	2.91898	-13.3133	0.28888	(sampled)
-30.8866	2.87112	-13.1766	0.29371	(mid-point)
-30.7616	2.82602	-13.0399	0.29869	(sampled)
-30.6366	2.78372	-12.904	0.30383	(mid-point)
-30.5116	2.74505	-12.7681	0.30911	(sampled)
-30.3866	2.71223	-12.633	0.31452	(mid-point)
-30.2616	2.68025	-12.498	0.32005	(sampled)
-30.1366	2.65457	-12.3619	0.3257	(mid-point)
-30.0116	2.63047	-12.2259	0.33145	(sampled)
-29.8866	2.56885	-12.0901	0.33748	(mid-point)
-29.7616	2.48653	-11.9543	0.34392	(sampled)
-29.6366	2.40676	-11.8184	0.35079	(mid-point)
-29.5116	2.32985	-11.6825	0.35812	(sampled)
-29.3866	2.25621	-11.5469	0.36593	(mid-point)
-29.2616	2.18577	-11.4113	0.37426	(sampled)
-29.1366	2.11966	-11.2753	0.38312	(mid-point)
-29.0116	2.05643	-11.1393	0.39252	(sampled)
-28.8866	1.99856	-11.004	0.40249	(mid-point)
-28.7616	1.94349	-10.8687	0.41302	(sampled)
-28.6366	1.89319	-10.7326	0.42412	(mid-point)
-28.5116	1.84685	-10.5965	0.43579	(sampled)
-28.3866	1.80584	-10.4612	0.44799	(mid-point)
-28.2616	1.76968	-10.326	0.46069	(sampled)
-28.1366	1.73863	-10.1903	0.47386	(mid-point)
-28.0116	1.71277	-10.0545	0.48742	(sampled)
-27.8866	1.69168	-9.91861	0.50132	(mid-point)
-27.7616	1.67602	-9.78268	0.51549	(sampled)
-27.6366	1.66694	-9.64771	0.52981	(mid-point)
-27.5116	1.66087	-9.51274	0.54423	(sampled)
-27.3866	1.66347	-9.37704	0.55861	(mid-point)
-27.2616	1.67033	-9.24134	0.57287	(sampled)
-27.1366	1.68355	-9.10504	0.58691	(mid-point)
-27.0116	1.70097	-8.96874	0.60066	(sampled)
-26.8866	1.72373	-8.83299	0.61405	(mid-point)
-26.7616	1.75172	-8.69725	0.62702	(sampled)
-26.6366	1.78612	-8.56216	0.63949	(mid-point)
-26.5116	1.82394	-8.42708	0.65145	(sampled)
-26.3866	1.86788	-8.29076	0.66285	(mid-point)
-26.2616	1.91545	-8.15444	0.6737	(sampled)
-26.1366	1.968	-8.01886	0.68397	(mid-point)
-26.0116	2.0248	-7.88329	0.69368	(sampled)
-25.8866	2.08535	-7.74783	0.70283	(mid-point)
-25.7616	2.14952	-7.61238	0.71144	(sampled)
-25.6366	2.21797	-7.47638	0.71953	(mid-point)
-25.5116	2.28992	-7.34038	0.72711	(sampled)
-25.3866	2.36575	-7.20554	0.73422	(mid-point)
-25.2616	2.44335	-7.0707	0.74089	(sampled)
-25.1366	2.52502	-6.93477	0.74713	(mid-point)
-25.0116	2.6085	-6.79883	0.75298	(sampled)
-24.8866	2.69476	-6.66326	0.75846	(mid-point)
-24.7616	2.78347	-6.52769	0.76359	(sampled)
-24.6366	2.8752	-6.39209	0.76841	(mid-point)
-24.5116	2.96851	-6.25648	0.77292	(sampled)
-24.3866	3.06399	-6.12077	0.77716	(mid-point)
-24.2616	3.16086	-5.98507	0.78114	(sampled)
-24.1366	3.26022	-5.84981	0.78488	(mid-point)
-24.0116	3.36056	-5.71456	0.78841	(sampled)
-23.8866	3.45795	-5.58057	0.79174	(mid-point)
-23.7616	3.46801	-5.44657	0.79504	(sampled)
-23.6366	3.38162	-5.31022	0.79852	(mid-point)
-23.5116	3.29687	-5.17387	0.80218	(sampled)
-23.3866	3.21455	-5.02923	0.80603	(mid-point)
-23.2616	3.13506	-4.88458	0.81008	(sampled)
-23.1366	3.05846	-4.7469	0.81434	(mid-point)
-23.0116	2.98419	-4.60922	0.8188	(sampled)
-22.8866	2.91263	-4.47327	0.82349	(mid-point)
-22.7616	2.84392	-4.33732	0.82841	(sampled)
-22.6366	2.77825	-4.20255	0.83357	(mid-point)
-22.5116	2.7153	-4.06778	0.83897	(sampled)
-22.3866	2.65565	-3.93338	0.84461	(mid-point)
-22.2616	2.59905	-3.79898	0.8505	(sampled)
-22.1366	2.54674	-3.66193	0.85663	(mid-point)
-22.0116	2.49811	-3.52488	0.86301	(sampled)
-21.8866	2.45235	-3.38969	0.86962	(mid-point)
-21.7616	2.41039	-3.2545	0.87647	(sampled)
-21.6366	2.37319	-3.11832	0.88354	(mid-point)
-21.5116	2.34008	-2.98215	0.8908	(sampled)
-21.3866	2.31045	-2.84701	0.89826	(mid-point)
-21.2616	2.28481	-2.71186	0.90588	(sampled)
-21.1366	2.26333	-2.57552	0.91365	(mid-point)
-21.0116	2.24629	-2.43918	0.92153	(sampled)
-20.8866	2.23562	-2.30363	0.92949	(mid-point)
-20.7616	2.2287	-2.16807	0.9375	(sampled)
-20.6366	2.22526	-2.03295	0.94554	(mid-point)
-20.5116	2.22629	-1.89782	0.95357	(sampled)
-20.3866	2.23228	-1.76201	0.96155	(mid-point)
-20.2616	2.24277	-1.6262	0.96946	(sampled)
-20.1366	2.25759	-1.49056	0.97727	(mid-point)
-20.0116	2.27669	-1.35492	0.98494	(sampled)
-19.8866	2.30035	-1.21983	0.99246	(mid-point)
-19.7616	2.32813	-1.08474	0.9998	(sampled)
-19.6366	2.35972	-0.9498	1.00695	(mid-point)
-19.5116	2.39538	-0.81485	1.01388	(sampled)
-19.3866	2.43525	-0.67954	1.02059	(mid-point)
-19.2616	2.47874	-0.54423	1.02707	(sampled)
-19.1366	2.52699	-0.40844	1.0333	(mid-point)
-19.0116	2.5783	-0.27265	1.03928	(sampled)
-18.8866	2.6333	-0.13632	1.04502	(mid-point)
-18.7616	2.69173	0	1.05051	(sampled)
-18.6366	2.7019	0.13814	1.05596	(mid-point)
-18.5116	2.70043	0.27629	1.06142	(sampled)
-18.3866	2.70145	0.41283	1.06687	(mid-point)
-18.2616	2.70521	0.54938	1.07231	(sampled)
-18.1366	2.71329	0.68476	1.07771	(mid-point)
-18.0116	2.72377	0.82015	1.08308	(sampled)
-17.8866	2.73887	0.95581	1.08838	(mid-point)
-17.7616	2.75792	1.09147	1.09361	(sampled)
-17.6366	2.78318	1.22701	1.09875	(mid-point)
-17.5116	2.81031	1.36255	1.10379	(sampled)
-17.3866	2.84121	1.49766	1.10872	(mid-point)
-17.2616	2.87578	1.63276	1.11353	(sampled)
-17.1366	2.89596	1.7673	1.11827	(mid-point)
-17.0116	2.91622	1.90185	1.12295	(sampled)
-16.8866	2.85293	2.03733	1.12784	(mid-point)
-16.7616	2.79272	2.17281	1.13294	(sampled)
-16.6366	2.73723	2.30933	1.13825	(mid-point)
-16.5116	2.68203	2.44585	1.14378	(sampled)
-16.3866	2.63214	2.58084	1.14953	(mid-point)
-16.2616	2.58556	2.71583	1.15548	(sampled)
-16.1366	2.54325	2.85169	1.16163	(mid-point)
-16.0116	2.50382	2.98755	1.16798	(sampled)
-15.8866	2.46873	3.12304	1.1745	(mid-point)
-15.7616	2.43764	3.25853	1.1812	(sampled)
-15.6366	2.41085	3.39372	1.18805	(mid-point)
-15.5116	2.38666	3.52891	1.19503	(sampled)
-15.3866	2.36872	3.66472	1.20212	(mid-point)
-15.2616	2.35415	3.80054	1.2093	(sampled)
-15.1366	2.34332	3.93636	1.21655	(mid-point)
-15.0116	2.33688	4.07219	1.22383	(sampled)
-14.8866	2.27763	4.20718	1.2315	(mid-point)
-14.7616	2.20633	4.34216	1.23968	(sampled)
-14.6366	2.13911	4.47778	1.24837	(mid-point)
-14.5116	2.07494	4.61339	1.25762	(sampled)
-14.3866	2.01511	4.74925	1.26741	(mid-point)
-14.2616	1.95861	4.88511	1.27779	(sampled)
-14.1366	1.90606	5.02045	1.28874	(mid-point)
-14.0116	1.85771	5.1558	1.30027	(sampled)
-13.8866	1.8148	5.29164	1.31235	(mid-point)
-13.7616	1.77522	5.42748	1.32497	(sampled)
-13.6366	1.74071	5.56315	1.3381	(mid-point)
-13.5116	1.71104	5.69883	1.3517	(sampled)
-13.3866	1.68651	5.83426	1.36568	(mid-point)
-13.2616	1.66703	5.96969	1.38	(sampled)
-13.1366	1.65288	6.10541	1.39457	(mid-point)
-13.0116	1.64324	6.24113	1.4093	(sampled)
-12.8866	1.63953	6.37659	1.4241	(mid-point)
-12.7616	1.64107	6.51205	1.43888	(sampled)
-12.6366	1.6469	6.6479	1.45355	(mid-point)
-12.5116	1.658	6.78375	1.46802	(sampled)
-12.3866	1.67492	6.91938	1.4822	(mid-point)
-12.2616	1.69695	7.055	1.49602	(sampled)
-12.1366	1.72396	7.19059	1.50941	(mid-point)
-12.0116	1.75576	7.32617	1.52232	(sampled)
-11.8866	1.79322	7.46149	1.53469	(mid-point)
-11.7616	1.835	7.59681	1.54651	(sampled)
-11.6366	1.87992	7.73294	1.55777	(mid-point)
-11.5116	1.92903	7.86906	1.56846	(sampled)
-11.3866	1.98402	8.00427	1.57857	(mid-point)
-11.2616	2.04293	8.13949	1.5881	(sampled)
-11.1366	2.10456	8.27528	1.59708	(mid-point)
-11.0116	2.16984	8.41106	1.60553	(sampled)
-10.8866	2.22333	8.54171	1.61358	(mid-point)
-10.7616	2.22136	8.67237	1.62165	(sampled)
-10.6366	2.13284	8.80816	1.63039	(mid-point)
-10.5116	2.04613	8.94395	1.6399	(sampled)
-10.3866	1.96238	9.09087	1.65023	(mid-point)
-10.2616	1.88245	9.23779	1.66146	(sampled)
-10.1366	1.80587	9.37549	1.67366	(mid-point)
-10.0116	1.73284	9.5132	1.68691	(sampled)
-9.8866	1.66394	9.64703	1.70128	(mid-point)
-9.7616	1.59869	9.78085	1.71685	(sampled)
-9.6366	1.538	9.91832	1.73367	(mid-point)
-9.5116	1.48187	10.0558	1.75179	(sampled)
-9.3866	1.429	10.1897	1.77127	(mid-point)
-9.2616	1.38083	10.3236	1.79214	(sampled)
-9.1366	1.3396	10.4597	1.81431	(mid-point)
-9.0116	1.30315	10.5959	1.83774	(sampled)
-8.8866	1.27169	10.7324	1.86235	(mid-point)
-8.7616	1.24593	10.8688	1.88798	(sampled)
-8.6366	1.22644	11.0038	1.91443	(mid-point)
-8.5116	1.21278	11.1388	1.94148	(sampled)
-8.3866	1.20407	11.2744	1.96893	(mid-point)
-8.2616	1.20131	11.41	1.9965	(sampled)
-8.1366	1.20614	11.5456	2.02385	(mid-point)
-8.0116	1.2154	11.6813	2.05078	(sampled)
-7.8866	1.23107	11.816	2.07704	(mid-point)
-7.7616	1.25251	11.9507	2.1024	(sampled)
-7.6366	1.28	12.0864	2.12668	(mid-point)
-7.5116	1.31308	12.222	2.14976	(sampled)
-7.3866	1.35104	12.3584	2.17156	(mid-point)
-7.2616	1.39349	12.4948	2.19205	(sampled)
-7.1366	1.44194	12.6297	2.21119	(mid-point)
-7.0116	1.49513	12.7645	2.22899	(sampled)
-6.8866	1.55309	12.9003	2.24548	(mid-point)
-6.7616	1.6154	13.0361	2.26073	(sampled)
-6.6366	1.68119	13.1721	2.27481	(mid-point)
-6.5116	1.75021	13.3081	2.2878	(sampled)
-6.3866	1.82544	13.4426	2.29974	(mid-point)
-6.2616	1.90291	13.5771	2.31072	(sampled)
-6.1366	1.98265	13.7135	2.32085	(mid-point)
-6.0116	2.06444	13.8498	2.33018	(sampled)
-5.8866	2.15165	13.9851	2.33878	(mid-point)
-5.7616	2.24126	14.1204	2.3467	(sampled)
-5.6366	2.32734	14.2598	2.35404	(mid-point)
-5.5116	2.41624	14.3992	2.36086	(sampled)
-5.3866	2.51701	14.5325	2.36714	(mid-point)
-5.2616	2.61934	14.6657	2.37294	(sampled)
-5.1366	2.71994	14.8001	2.37832	(mid-point)
-5.0116	2.82225	14.9346	2.38331	(sampled)
-4.8866	2.92561	15.0693	2.38796	(mid-point)
-4.7616	3.03045	15.2041	2.39229	(sampled)
-4.6366	3.13692	15.3402	2.39634	(mid-point)
-4.5116	3.2448	15.4764	2.40012	(sampled)
-4.3866	3.35001	15.6141	2.40366	(mid-point)
-4.2616	3.41199	15.7518	2.40708	(sampled)
-4.1366	3.38243	15.8871	2.41056	(mid-point)
-4.0116	3.35635	16.0224	2.41409	(sampled)
-3.8866	3.3335	16.1575	2.41767	(mid-point)
-3.7616	3.31418	16.2926	2.42129	(sampled)
-3.6366	3.29859	16.4295	2.42495	(mid-point)
-3.5116	3.28622	16.5663	2.42863	(sampled)
-3.3866	3.27941	16.7012	2.43233	(mid-point)
-3.2616	3.27628	16.8361	2.43604	(sampled)
-3.1366	3.27572	16.9719	2.43975	(mid-point)
-3.0116	3.27848	17.1077	2.44345	(sampled)
-2.8866	3.28587	17.243	2.44713	(mid-point)
-2.7616	3.29696	17.3784	2.4508	(sampled)
-2.6366	3.31111	17.5139	2.45442	(mid-point)
-2.5116	3.32866	17.6493	2.45802	(sampled)
-2.3866	3.35018	17.7855	2.46156	(mid-point)
-2.2616	3.37506	17.9216	2.46505	(sampled)
-2.1366	3.40412	18.0568	2.46849	(mid-point)
-2.0116	3.43661	18.192	2.47186	(sampled)
-1.8866	3.47212	18.3278	2.47516	(mid-point)
-1.7616	3.5105	18.4636	2.47839	(sampled)
-1.6366	3.55288	18.5992	2.48154	(mid-point)
-1.5116	3.5981	18.7348	2.48461	(sampled)
-1.3866	3.64631	18.8701	2.4876	(mid-point)
-1.2616	3.69719	19.0055	2.49051	(sampled)
-1.1366	3.75135	19.1421	2.49334	(mid-point)
-1.0116	3.80772	19.2788	2.49609	(sampled)
-0.8866	3.86795	19.414	2.49875	(mid-point)
-0.7616	3.93081	19.5493	2.50132	(sampled)
-0.6366	3.99587	19.6844	2.50381	(mid-point)
-0.5116	4.06322	19.8194	2.50622	(sampled)
-0.3866	4.13302	19.9563	2.50855	(mid-point)
-0.2616	4.20465	20.0932	2.5108	(sampled)
-0.1366	4.27951	20.228	2.51297	(mid-point)
-0.0116	4.35647	20.3628	2.51507	(sampled)
0.1134	4.43553	20.4981	2.51709	(mid-point)
0.2384	4.51568	20.6334	2.51904	(sampled)
0.3634	4.59849	20.7698	2.52093	(mid-point)
0.4884	4.68263	20.9062	2.52274	(sampled)
0.6134	4.7676	21.0432	2.52449	(mid-point)
0.7384	4.85435	21.1802	2.52618	(sampled)

## Sheet: Alpo4_CHAPS
cenxyz.cvec	radius	cen_line_D	sum{s/(area	point	sourc
-44.1045	9.792	-28.9326	0.00041	(sampled)
-43.9795	9.68051	-28.7994	0.00084	(mid-point)
-43.8545	9.56949	-28.6662	0.00127	(sampled)
-43.7295	9.45877	-28.5325	0.00172	(mid-point)
-43.6045	9.34855	-28.3987	0.00217	(sampled)
-43.4795	9.23923	-28.2638	0.00264	(mid-point)
-43.3545	9.13045	-28.129	0.00312	(sampled)
-43.2295	9.02202	-27.9947	0.00361	(mid-point)
-43.1045	8.91417	-27.8603	0.00411	(sampled)
-42.9795	8.80693	-27.724	0.00462	(mid-point)
-42.8545	8.70038	-27.5876	0.00515	(sampled)
-42.7295	8.59447	-27.4526	0.00568	(mid-point)
-42.6045	8.4892	-27.3177	0.00624	(sampled)
-42.4795	8.38473	-27.1844	0.0068	(mid-point)
-42.3545	8.2809	-27.0511	0.00738	(sampled)
-42.2295	8.17782	-26.9162	0.00798	(mid-point)
-42.1045	8.07548	-26.7813	0.00859	(sampled)
-41.9795	7.97367	-26.648	0.00921	(mid-point)
-41.8545	7.87263	-26.5147	0.00986	(sampled)
-41.7295	7.77288	-26.3809	0.01051	(mid-point)
-41.6045	7.67348	-26.2472	0.01119	(sampled)
-41.4795	7.57563	-26.1119	0.01188	(mid-point)
-41.3545	7.47786	-25.9765	0.01259	(sampled)
-41.2295	7.38183	-25.8427	0.01332	(mid-point)
-41.1045	7.28642	-25.7088	0.01407	(sampled)
-40.9795	7.19236	-25.5723	0.01484	(mid-point)
-40.8545	7.09823	-25.4357	0.01563	(sampled)
-40.7295	6.99894	-25.301	0.01645	(mid-point)
-40.6045	6.90058	-25.1662	0.01728	(sampled)
-40.4795	6.80368	-25.034	0.01814	(mid-point)
-40.3545	6.7076	-24.9018	0.01902	(sampled)
-40.2295	6.61271	-24.7728	0.01993	(mid-point)
-40.1045	6.51873	-24.6438	0.02087	(sampled)
-39.9795	6.4247	-24.4541	0.02184	(mid-point)
-39.8545	6.33399	-24.2644	0.02283	(sampled)
-39.7295	6.24384	-24.1353	0.02385	(mid-point)
-39.6045	6.15476	-24.0062	0.0249	(sampled)
-39.4795	6.067	-23.8705	0.02598	(mid-point)
-39.3545	5.98061	-23.7348	0.02709	(sampled)
-39.2295	5.89552	-23.6044	0.02824	(mid-point)
-39.1045	5.81171	-23.4739	0.02941	(sampled)
-38.9795	5.72914	-23.3414	0.03063	(mid-point)
-38.8545	5.64801	-23.2089	0.03187	(sampled)
-38.7295	5.5656	-23.0803	0.03316	(mid-point)
-38.6045	5.48451	-22.9518	0.03448	(sampled)
-38.4795	5.40279	-22.8243	0.03584	(mid-point)
-38.3545	5.32232	-22.6968	0.03725	(sampled)
-38.2295	5.24126	-22.5285	0.0387	(mid-point)
-38.1045	5.16323	-22.3602	0.04019	(sampled)
-37.9795	5.0875	-22.216	0.04173	(mid-point)
-37.8545	5.01396	-22.0719	0.04331	(sampled)
-37.7295	4.9417	-21.9389	0.04494	(mid-point)
-37.6045	4.87129	-21.8059	0.04662	(sampled)
-37.4795	4.80324	-21.6719	0.04834	(mid-point)
-37.3545	4.73721	-21.538	0.05011	(sampled)
-37.2295	4.67262	-21.4058	0.05194	(mid-point)
-37.1045	4.60996	-21.2736	0.05381	(sampled)
-36.9795	4.55037	-21.1377	0.05573	(mid-point)
-36.8545	4.49313	-21.0017	0.0577	(sampled)
-36.7295	4.438	-20.868	0.05972	(mid-point)
-36.6045	4.38525	-20.7343	0.06179	(sampled)
-36.4795	4.33544	-20.5991	0.06391	(mid-point)
-36.3545	4.28777	-20.4639	0.06607	(sampled)
-36.2295	4.21947	-20.3067	0.06831	(mid-point)
-36.1045	4.15451	-20.1495	0.07061	(sampled)
-35.9795	4.06445	-20.0125	0.07302	(mid-point)
-35.8545	3.97417	-19.8754	0.07554	(sampled)
-35.7295	3.87196	-19.7349	0.07819	(mid-point)
-35.6045	3.77075	-19.5944	0.08099	(sampled)
-35.4795	3.67233	-19.4563	0.08394	(mid-point)
-35.3545	3.57517	-19.3181	0.08705	(sampled)
-35.2295	3.48045	-19.1822	0.09034	(mid-point)
-35.1045	3.38541	-19.0464	0.09381	(sampled)
-34.9795	3.29144	-18.9115	0.09748	(mid-point)
-34.8545	3.19848	-18.7767	0.10137	(sampled)
-34.7295	3.10757	-18.6428	0.10549	(mid-point)
-34.6045	3.01818	-18.5088	0.10986	(sampled)
-34.4795	2.93151	-18.3746	0.11449	(mid-point)
-34.3545	2.84717	-18.2403	0.1194	(sampled)
-34.2295	2.76606	-18.1059	0.1246	(mid-point)
-34.1045	2.68745	-17.9715	0.13011	(sampled)
-33.9795	2.61065	-17.8374	0.13595	(mid-point)
-33.8545	2.53658	-17.7033	0.14213	(sampled)
-33.7295	2.46783	-17.5683	0.14866	(mid-point)
-33.6045	2.3998	-17.4332	0.15557	(sampled)
-33.4795	2.33658	-17.2993	0.16286	(mid-point)
-33.3545	2.27691	-17.1653	0.17053	(sampled)
-33.2295	2.22012	-17.0313	0.17861	(mid-point)
-33.1045	2.16681	-16.8973	0.18708	(sampled)
-32.9795	2.11957	-16.7625	0.19594	(mid-point)
-32.8545	2.0751	-16.6277	0.20518	(sampled)
-32.7295	2.03389	-16.4922	0.2148	(mid-point)
-32.6045	1.99725	-16.3568	0.22477	(sampled)
-32.4795	1.96742	-16.2237	0.23505	(mid-point)
-32.3545	1.94172	-16.0907	0.2456	(sampled)
-32.2295	1.92126	-15.9562	0.25638	(mid-point)
-32.1045	1.90576	-15.8217	0.26734	(sampled)
-31.9795	1.89508	-15.6874	0.27842	(mid-point)
-31.8545	1.88873	-15.5531	0.28957	(sampled)
-31.7295	1.88762	-15.4186	0.30074	(mid-point)
-31.6045	1.89163	-15.284	0.31186	(sampled)
-31.4795	1.90135	-15.1502	0.32286	(mid-point)
-31.3545	1.91594	-15.0164	0.3337	(sampled)
-31.2295	1.93444	-14.8813	0.34434	(mid-point)
-31.1045	1.95778	-14.7462	0.35472	(sampled)
-30.9795	1.98607	-14.6127	0.3648	(mid-point)
-30.8545	2.01902	-14.4791	0.37457	(sampled)
-30.7295	2.05761	-14.3427	0.38396	(mid-point)
-30.6045	2.10033	-14.2064	0.39298	(sampled)
-30.4795	2.14848	-14.0734	0.4016	(mid-point)
-30.3545	2.20019	-13.9405	0.40982	(sampled)
-30.2295	2.25513	-13.8064	0.41765	(mid-point)
-30.1045	2.31386	-13.6722	0.42508	(sampled)
-29.9795	2.37479	-13.5384	0.43213	(mid-point)
-29.8545	2.4392	-13.4045	0.43882	(sampled)
-29.7295	2.50706	-13.2701	0.44515	(mid-point)
-29.6045	2.57811	-13.1357	0.45114	(sampled)
-29.4795	2.60228	-12.9894	0.45701	(mid-point)
-29.3545	2.63027	-12.8431	0.46276	(sampled)
-29.2295	2.58878	-12.71	0.4687	(mid-point)
-29.1045	2.54905	-12.577	0.47482	(sampled)
-28.9795	2.5153	-12.4411	0.48111	(mid-point)
-28.8545	2.48428	-12.3051	0.48756	(sampled)
-28.7295	2.45879	-12.172	0.49414	(mid-point)
-28.6045	2.43687	-12.0389	0.50084	(sampled)
-28.4795	2.41959	-11.9042	0.50764	(mid-point)
-28.3545	2.40609	-11.7696	0.51451	(sampled)
-28.2295	2.39636	-11.6344	0.52144	(mid-point)
-28.1045	2.39112	-11.4993	0.5284	(sampled)
-27.9795	2.39146	-11.3664	0.53536	(mid-point)
-27.8545	2.39617	-11.2335	0.54229	(sampled)
-27.7295	2.40531	-11.0978	0.54916	(mid-point)
-27.6045	2.41896	-10.9622	0.55596	(sampled)
-27.4795	2.43679	-10.8282	0.56266	(mid-point)
-27.3545	2.45886	-10.6942	0.56925	(sampled)
-27.2295	2.48549	-10.5604	0.57569	(mid-point)
-27.1045	2.51607	-10.4267	0.58197	(sampled)
-26.9795	2.55041	-10.2926	0.58809	(mid-point)
-26.8545	2.58871	-10.1585	0.59403	(sampled)
-26.7295	2.63022	-10.0234	0.59978	(mid-point)
-26.6045	2.67555	-9.88822	0.60534	(sampled)
-26.4795	2.72607	-9.75464	0.61069	(mid-point)
-26.3545	2.77988	-9.62106	0.61584	(sampled)
-26.2295	2.83592	-9.48577	0.62079	(mid-point)
-26.1045	2.8953	-9.35048	0.62553	(sampled)
-25.9795	2.95898	-9.21758	0.63008	(mid-point)
-25.8545	3.02517	-9.08468	0.63442	(sampled)
-25.7295	3.08085	-8.92461	0.63862	(mid-point)
-25.6045	3.13698	-8.76455	0.64266	(sampled)
-25.4795	3.17107	-8.62818	0.64662	(mid-point)
-25.3545	3.20844	-8.49181	0.65048	(sampled)
-25.2295	3.24884	-8.35828	0.65425	(mid-point)
-25.1045	3.29224	-8.22476	0.65792	(sampled)
-24.9795	3.33954	-8.09033	0.66149	(mid-point)
-24.8545	3.38846	-7.9559	0.66495	(sampled)
-24.7295	3.44111	-7.82054	0.66832	(mid-point)
-24.6045	3.49513	-7.68517	0.67157	(sampled)
-24.4795	3.5545	-7.55149	0.67472	(mid-point)
-24.3545	3.615	-7.4178	0.67777	(sampled)
-24.2295	3.67883	-7.2835	0.68071	(mid-point)
-24.1045	3.74475	-7.1492	0.68354	(sampled)
-23.9795	3.81325	-7.01516	0.68628	(mid-point)
-23.8545	3.88231	-6.88112	0.68892	(sampled)
-23.7295	3.95328	-6.74866	0.69147	(mid-point)
-23.6045	4.02638	-6.6162	0.69392	(sampled)
-23.4795	4.1012	-6.48388	0.69629	(mid-point)
-23.3545	4.17744	-6.35156	0.69857	(sampled)
-23.2295	4.25625	-6.21845	0.70076	(mid-point)
-23.1045	4.3367	-6.08534	0.70288	(sampled)
-22.9795	4.41946	-5.95137	0.70491	(mid-point)
-22.8545	4.50336	-5.8174	0.70688	(sampled)
-22.7295	4.58924	-5.68428	0.70877	(mid-point)
-22.6045	4.67671	-5.55117	0.71058	(sampled)
-22.4795	4.73329	-5.38275	0.71236	(mid-point)
-22.3545	4.75921	-5.21434	0.71412	(sampled)
-22.2295	4.77315	-5.07864	0.71586	(mid-point)
-22.1045	4.78887	-4.94294	0.7176	(sampled)
-21.9795	4.80783	-4.80699	0.71932	(mid-point)
-21.8545	4.82959	-4.67105	0.72103	(sampled)
-21.7295	4.85308	-4.53393	0.72272	(mid-point)
-21.6045	4.87925	-4.39682	0.72439	(sampled)
-21.4795	4.9087	-4.26327	0.72604	(mid-point)
-21.3545	4.94036	-4.12971	0.72767	(sampled)
-21.2295	4.971	-3.99761	0.72928	(mid-point)
-21.1045	5.00407	-3.8655	0.73087	(sampled)
-20.9795	5.03926	-3.73201	0.73243	(mid-point)
-20.8545	5.07573	-3.59851	0.73398	(sampled)
-20.7295	5.04553	-3.43514	0.73554	(mid-point)
-20.6045	5.01715	-3.27176	0.73712	(sampled)
-20.4795	4.99037	-3.11344	0.73872	(mid-point)
-20.3545	4.96521	-2.95512	0.74033	(sampled)
-20.2295	4.91322	-2.82062	0.74198	(mid-point)
-20.1045	4.86353	-2.68612	0.74366	(sampled)
-19.9795	4.81578	-2.55164	0.74538	(mid-point)
-19.8545	4.77024	-2.41716	0.74713	(sampled)
-19.7295	4.72797	-2.28299	0.74891	(mid-point)
-19.6045	4.68818	-2.14882	0.75072	(sampled)
-19.4795	4.65001	-2.01559	0.75256	(mid-point)
-19.3545	4.61398	-1.88235	0.75443	(sampled)
-19.2295	4.58234	-1.74729	0.75632	(mid-point)
-19.1045	4.55339	-1.61224	0.75824	(sampled)
-18.9795	4.52546	-1.479	0.76018	(mid-point)
-18.8545	4.50008	-1.34577	0.76215	(sampled)
-18.7295	4.4791	-1.21043	0.76413	(mid-point)
-18.6045	4.46096	-1.07509	0.76613	(sampled)
-18.4795	4.44494	-0.94095	0.76815	(mid-point)
-18.3545	4.43174	-0.8068	0.77017	(sampled)
-18.2295	4.42195	-0.67186	0.77221	(mid-point)
-18.1045	4.41506	-0.53693	0.77425	(sampled)
-17.9795	4.41031	-0.40261	0.77629	(mid-point)
-17.8545	4.40832	-0.26829	0.77834	(sampled)
-17.7295	4.40959	-0.13415	0.78039	(mid-point)
-17.6045	4.41351	0	0.78243	(sampled)
-17.4795	4.42073	0.13418	0.78447	(mid-point)
-17.3545	4.43061	0.26835	0.78649	(sampled)
-17.2295	4.44313	0.40273	0.78851	(mid-point)
-17.1045	4.4583	0.5371	0.79051	(sampled)
-16.9795	4.4764	0.67133	0.7925	(mid-point)
-16.8545	4.49729	0.80555	0.79446	(sampled)
-16.7295	4.52172	0.93968	0.79641	(mid-point)
-16.6045	4.54733	1.07381	0.79833	(sampled)
-16.4795	4.5773	1.20796	0.80023	(mid-point)
-16.3545	4.60838	1.3421	0.80211	(sampled)
-16.2295	4.64397	1.47687	0.80395	(mid-point)
-16.1045	4.68185	1.61163	0.80577	(sampled)
-15.9795	4.72138	1.74574	0.80755	(mid-point)
-15.8545	4.76311	1.87984	0.8093	(sampled)
-15.7295	4.80755	2.01463	0.81103	(mid-point)
-15.6045	4.85347	2.14941	0.81272	(sampled)
-15.4795	4.9033	2.28379	0.81437	(mid-point)
-15.3545	4.95543	2.41816	0.81599	(sampled)
-15.2295	5.00861	2.55262	0.81758	(mid-point)
-15.1045	5.06399	2.68708	0.81913	(sampled)
-14.9795	5.10303	2.84086	0.82066	(mid-point)
-14.8545	5.14436	2.99463	0.82216	(sampled)
-14.7295	5.11215	3.16785	0.82368	(mid-point)
-14.6045	5.08303	3.34106	0.82522	(sampled)
-14.4795	5.04365	3.47276	0.82679	(mid-point)
-14.3545	5.00657	3.60446	0.82837	(sampled)
-14.2295	4.97202	3.73678	0.82998	(mid-point)
-14.1045	4.93987	3.8691	0.83161	(sampled)
-13.9795	4.91139	4.00367	0.83326	(mid-point)
-13.8545	4.88503	4.13824	0.83493	(sampled)
-13.7295	4.86096	4.2711	0.83661	(mid-point)
-13.6045	4.8392	4.40396	0.83831	(sampled)
-13.4795	4.82008	4.5354	0.84003	(mid-point)
-13.3545	4.80245	4.66685	0.84175	(sampled)
-13.2295	4.78865	4.80019	0.84349	(mid-point)
-13.1045	4.77739	4.93353	0.84523	(sampled)
-12.9795	4.76889	5.06595	0.84698	(mid-point)
-12.8545	4.76251	5.19837	0.84873	(sampled)
-12.7295	4.75987	5.3321	0.85049	(mid-point)
-12.6045	4.75993	5.46583	0.85225	(sampled)
-12.4795	4.76087	5.59937	0.854	(mid-point)
-12.3545	4.76383	5.73291	0.85575	(sampled)
-12.2295	4.77253	5.86543	0.8575	(mid-point)
-12.1045	4.7837	5.99795	0.85924	(sampled)
-11.9795	4.79718	6.13033	0.86097	(mid-point)
-11.8545	4.81203	6.26271	0.86269	(sampled)
-11.7295	4.82939	6.3961	0.86439	(mid-point)
-11.6045	4.84937	6.52949	0.86609	(sampled)
-11.4795	4.87229	6.66201	0.86776	(mid-point)
-11.3545	4.89772	6.79453	0.86942	(sampled)
-11.2295	4.92566	6.92787	0.87106	(mid-point)
-11.1045	4.95609	7.0612	0.87268	(sampled)
-10.9795	4.98904	7.19383	0.87428	(mid-point)
-10.8545	5.02439	7.32646	0.87585	(sampled)
-10.7295	5.06325	7.45864	0.87741	(mid-point)
-10.6045	5.10238	7.59081	0.87894	(sampled)
-10.4795	5.14522	7.72374	0.88044	(mid-point)
-10.3545	5.1903	7.85667	0.88192	(sampled)
-10.2295	5.23625	7.99105	0.88337	(mid-point)
-10.1045	5.28319	8.12542	0.88479	(sampled)
-9.9795	5.33638	8.25634	0.88619	(mid-point)
-9.8545	5.38895	8.38725	0.88756	(sampled)
-9.7295	5.44448	8.52029	0.8889	(mid-point)
-9.6045	5.50169	8.65334	0.89022	(sampled)
-9.4795	5.56158	8.788	0.8915	(mid-point)
-9.3545	5.62085	8.92267	0.89276	(sampled)
-9.2295	5.68469	9.0547	0.89399	(mid-point)
-9.1045	5.75028	9.18673	0.8952	(sampled)
-8.9795	5.81558	9.31809	0.89637	(mid-point)
-8.8545	5.88231	9.44946	0.89752	(sampled)
-8.7295	5.95349	9.58498	0.89865	(mid-point)
-8.6045	6.02481	9.7205	0.89974	(sampled)
-8.4795	6.09859	9.85198	0.90081	(mid-point)
-8.3545	6.17299	9.98345	0.90186	(sampled)
-8.2295	6.2495	10.117	0.90287	(mid-point)
-8.1045	6.32747	10.2505	0.90387	(sampled)
-7.9795	6.40627	10.3834	0.90484	(mid-point)
-7.8545	6.48645	10.5162	0.90578	(sampled)
-7.7295	6.56631	10.6514	0.90671	(mid-point)
-7.6045	6.64758	10.7866	0.90761	(sampled)
-7.4795	6.72863	10.9264	0.90849	(mid-point)
-7.3545	6.81117	11.0662	0.90934	(sampled)
-7.2295	6.83921	11.2117	0.91019	(mid-point)
-7.1045	6.86586	11.3572	0.91104	(sampled)
-6.9795	6.79072	11.5427	0.9119	(mid-point)
-6.8545	6.71842	11.7282	0.91278	(sampled)
-6.7295	6.64154	11.8641	0.91368	(mid-point)
-6.6045	6.56477	12	0.91461	(sampled)
-6.4795	6.49249	12.1317	0.91555	(mid-point)
-6.3545	6.42026	12.2633	0.91652	(sampled)
-6.2295	6.36359	12.5114	0.9175	(mid-point)
-6.1045	6.31314	12.7594	0.9185	(sampled)
-5.9795	6.25122	12.8954	0.91952	(mid-point)
-5.8545	6.19064	13.0314	0.92055	(sampled)
-5.7295	6.13276	13.1695	0.92161	(mid-point)
-5.6045	6.07689	13.3076	0.92269	(sampled)
-5.4795	6.01849	13.4362	0.92379	(mid-point)
-5.3545	5.96179	13.5648	0.92491	(sampled)
-5.2295	5.91561	13.7149	0.92604	(mid-point)
-5.1045	5.87211	13.8651	0.9272	(sampled)
-4.9795	5.82652	14.0029	0.92837	(mid-point)
-4.8545	5.78317	14.1408	0.92956	(sampled)
-4.7295	5.72642	14.2693	0.93077	(mid-point)
-4.6045	5.67059	14.3978	0.93201	(sampled)
-4.4795	5.61417	14.5486	0.93327	(mid-point)
-4.3545	5.56037	14.6994	0.93456	(sampled)
-4.2295	5.50821	14.8385	0.93587	(mid-point)
-4.1045	5.45832	14.9776	0.93721	(sampled)
-3.9795	5.34096	16.1317	0.9386	(mid-point)
-3.8545	5.40721	17.2858	0.93996	(sampled)
-3.7295	5.36241	17.418	0.94135	(mid-point)
-3.6045	5.31932	17.5502	0.94275	(sampled)
-3.4795	5.31579	17.742	0.94416	(mid-point)
-3.3545	5.30889	17.9337	0.94557	(sampled)
-3.2295	5.29426	18.0687	0.94699	(mid-point)
-3.1045	5.28192	18.2038	0.94842	(sampled)
-2.9795	5.27044	18.3401	0.94985	(mid-point)
-2.8545	5.26133	18.4764	0.95129	(sampled)
-2.7295	5.25469	18.6118	0.95273	(mid-point)
-2.6045	5.25045	18.7473	0.95417	(sampled)
-2.4795	5.24869	18.8828	0.95562	(mid-point)
-2.3545	5.24954	19.0184	0.95706	(sampled)
-2.2295	5.25394	19.1549	0.9585	(mid-point)
-2.1045	5.26042	19.2914	0.95994	(sampled)
-1.9795	5.26864	19.4286	0.96137	(mid-point)
-1.8545	5.27942	19.5658	0.9628	(sampled)
-1.7295	5.29415	19.6992	0.96422	(mid-point)
-1.6045	5.31136	19.8326	0.96563	(sampled)
-1.4795	5.33186	19.9688	0.96703	(mid-point)
-1.3545	5.35354	20.1051	0.96842	(sampled)
-1.2295	5.37863	20.2421	0.96979	(mid-point)
-1.1045	5.40437	20.3791	0.97116	(sampled)
-0.9795	5.43423	20.5139	0.9725	(mid-point)
-0.8545	5.46585	20.6487	0.97383	(sampled)
-0.7295	5.50118	20.7845	0.97515	(mid-point)
-0.6045	5.53534	20.9204	0.97645	(sampled)
-0.4795	5.57547	21.0555	0.97773	(mid-point)
-0.3545	5.61787	21.1905	0.97899	(sampled)
-0.2295	5.66112	21.3269	0.98023	(mid-point)
-0.1045	5.70662	21.4633	0.98145	(sampled)
0.0205	5.75521	21.5985	0.98265	(mid-point)
0.1455	5.80497	21.7336	0.98383	(sampled)
0.2705	5.85697	21.8695	0.98499	(mid-point)
0.3955	5.91103	22.0053	0.98613	(sampled)
0.5205	5.96737	22.1416	0.98725	(mid-point)
0.6455	6.02567	22.2779	0.98835	(sampled)
0.7705	6.07941	22.4254	0.98942	(mid-point)
0.8955	6.13524	22.5729	0.99048	(sampled)
1.0205	6.20531	22.7023	0.99151	(mid-point)
1.1455	6.27575	22.8318	0.99252	(sampled)
1.2705	6.34262	22.9675	0.99351	(mid-point)
1.3955	6.41119	23.1033	0.99448	(sampled)
1.5205	6.4778	23.2582	0.99543	(mid-point)
1.6455	6.54677	23.413	0.99636	(sampled)
1.7705	6.6248	23.5401	0.99726	(mid-point)
1.8955	6.70402	23.667	0.99815	(sampled)
2.0205	6.75679	24.37	0.99902	(mid-point)
2.1455	6.86678	25.073	0.99986	(sampled)
2.2705	6.95427	25.2024	1.00069	(mid-point)
2.3955	7.04223	25.3319	1.00149	(sampled)
2.5205	7.12748	25.4594	1.00227	(mid-point)
2.6455	7.21318	25.5869	1.00304	(sampled)
2.7705	7.30192	25.7128	1.00378	(mid-point)
2.8955	7.38706	25.8387	1.00451	(sampled)
3.0205	7.48151	25.9777	1.00522	(mid-point)
3.1455	7.57708	26.1168	1.00592	(sampled)
3.2705	7.6692	26.2447	1.00659	(mid-point)
3.3955	7.76214	26.3727	1.00725	(sampled)
3.5205	7.85381	26.499	1.0079	(mid-point)
3.6455	7.94625	26.6253	1.00853	(sampled)
3.7705	8.04359	26.7597	1.00914	(mid-point)
3.8955	8.1418	26.8941	1.00974	(sampled)
4.0205	8.23992	27.0222	1.01033	(mid-point)
4.1455	8.33763	27.1503	1.0109	(sampled)
4.2705	8.435	27.2769	1.01146	(mid-point)
4.3955	8.53194	27.4034	1.01201	(sampled)
4.5205	8.63308	27.5347	1.01254	(mid-point)
4.6455	8.7349	27.6659	1.01306	(sampled)
4.7705	8.8364	27.7944	1.01357	(mid-point)
4.8955	8.93724	27.9229	1.01407	(sampled)
5.0205	9.03914	28.0511	1.01456	(mid-point)
5.1455	9.14132	28.1793	1.01503	(sampled)
5.2705	9.24444	28.3065	1.0155	(mid-point)
5.3955	9.34803	28.4337	1.01595	(sampled)
5.5205	9.45182	28.5614	1.0164	(mid-point)
5.6455	9.55611	28.6892	1.01684	(sampled)
5.7705	9.66186	28.8183	1.01726	(mid-point)
5.8955	9.768	28.9475	1.01768	(sampled)
6.0205	9.87417	29.0759	1.01809	(mid-point)
6.1455	9.98064	29.2042	1.01849	(sampled)
Minimum	radius	found:	1.888	angstroms.
For	spherical	probe	approach,	The	geometric	factor
F=	sum(ds/area)	along	channel	is	1.018	angstroms**-1
This	yields	a	macroscopic	predicted	molar	conductance	of:
(1/rho)*(100/F)=	(98/rho)	pS,
where	rho	is	the	conductivity	of	1M	permeant	ion	in	ohm	m.
N.B.	this	is	a	macroscopic	conductance	-	an	overestimate
Empirically	corrected	conductances	currently	only	available
With	the	CAPSULE	option	(although	its	not	that	stable!)
For	1M	KCl	rho=	2023-12-01	(ohm	m),	So	Gmacro=	1200	pS/M.
(TAG	1	Rmin=	1.88762	Gmacro=	1178.22	Conn_Gmacro=	-1	).
HOLE:	normal	completion

## Sheet: 5KXI
cenxyz.cvec	radius	cen_line_D	sum{s/(area	point	sourc
-44.1045	9.792	-28.9326	0.00041	(sampled)
-43.9795	9.68051	-28.7994	0.00084	(mid-point)
-43.8545	9.56949	-28.6662	0.00127	(sampled)
-43.7295	9.45877	-28.5325	0.00172	(mid-point)
-43.6045	9.34855	-28.3987	0.00217	(sampled)
-43.4795	9.23923	-28.2638	0.00264	(mid-point)
-43.3545	9.13045	-28.129	0.00312	(sampled)
-43.2295	9.02202	-27.9947	0.00361	(mid-point)
-43.1045	8.91417	-27.8603	0.00411	(sampled)
-42.9795	8.80693	-27.724	0.00462	(mid-point)
-42.8545	8.70038	-27.5876	0.00515	(sampled)
-42.7295	8.59447	-27.4526	0.00568	(mid-point)
-42.6045	8.4892	-27.3177	0.00624	(sampled)
-42.4795	8.38473	-27.1844	0.0068	(mid-point)
-42.3545	8.2809	-27.0511	0.00738	(sampled)
-42.2295	8.17782	-26.9162	0.00798	(mid-point)
-42.1045	8.07548	-26.7813	0.00859	(sampled)
-41.9795	7.97367	-26.648	0.00921	(mid-point)
-41.8545	7.87263	-26.5147	0.00986	(sampled)
-41.7295	7.77288	-26.3809	0.01051	(mid-point)
-41.6045	7.67348	-26.2472	0.01119	(sampled)
-41.4795	7.57563	-26.1119	0.01188	(mid-point)
-41.3545	7.47786	-25.9765	0.01259	(sampled)
-41.2295	7.38183	-25.8427	0.01332	(mid-point)
-41.1045	7.28642	-25.7088	0.01407	(sampled)
-40.9795	7.19236	-25.5723	0.01484	(mid-point)
-40.8545	7.09823	-25.4357	0.01563	(sampled)
-40.7295	6.99894	-25.301	0.01645	(mid-point)
-40.6045	6.90058	-25.1662	0.01728	(sampled)
-40.4795	6.80368	-25.034	0.01814	(mid-point)
-40.3545	6.7076	-24.9018	0.01902	(sampled)
-40.2295	6.61271	-24.7728	0.01993	(mid-point)
-40.1045	6.51873	-24.6438	0.02087	(sampled)
-39.9795	6.4247	-24.4541	0.02184	(mid-point)
-39.8545	6.33399	-24.2644	0.02283	(sampled)
-39.7295	6.24384	-24.1353	0.02385	(mid-point)
-39.6045	6.15476	-24.0062	0.0249	(sampled)
-39.4795	6.067	-23.8705	0.02598	(mid-point)
-39.3545	5.98061	-23.7348	0.02709	(sampled)
-39.2295	5.89552	-23.6044	0.02824	(mid-point)
-39.1045	5.81171	-23.4739	0.02941	(sampled)
-38.9795	5.72914	-23.3414	0.03063	(mid-point)
-38.8545	5.64801	-23.2089	0.03187	(sampled)
-38.7295	5.5656	-23.0803	0.03316	(mid-point)
-38.6045	5.48451	-22.9518	0.03448	(sampled)
-38.4795	5.40279	-22.8243	0.03584	(mid-point)
-38.3545	5.32232	-22.6968	0.03725	(sampled)
-38.2295	5.24126	-22.5285	0.0387	(mid-point)
-38.1045	5.16323	-22.3602	0.04019	(sampled)
-37.9795	5.0875	-22.216	0.04173	(mid-point)
-37.8545	5.01396	-22.0719	0.04331	(sampled)
-37.7295	4.9417	-21.9389	0.04494	(mid-point)
-37.6045	4.87129	-21.8059	0.04662	(sampled)
-37.4795	4.80324	-21.6719	0.04834	(mid-point)
-37.3545	4.73721	-21.538	0.05011	(sampled)
-37.2295	4.67262	-21.4058	0.05194	(mid-point)
-37.1045	4.60996	-21.2736	0.05381	(sampled)
-36.9795	4.55037	-21.1377	0.05573	(mid-point)
-36.8545	4.49313	-21.0017	0.0577	(sampled)
-36.7295	4.438	-20.868	0.05972	(mid-point)
-36.6045	4.38525	-20.7343	0.06179	(sampled)
-36.4795	4.33544	-20.5991	0.06391	(mid-point)
-36.3545	4.28777	-20.4639	0.06607	(sampled)
-36.2295	4.21947	-20.3067	0.06831	(mid-point)
-36.1045	4.15451	-20.1495	0.07061	(sampled)
-35.9795	4.06445	-20.0125	0.07302	(mid-point)
-35.8545	3.97417	-19.8754	0.07554	(sampled)
-35.7295	3.87196	-19.7349	0.07819	(mid-point)
-35.6045	3.77075	-19.5944	0.08099	(sampled)
-35.4795	3.67233	-19.4563	0.08394	(mid-point)
-35.3545	3.57517	-19.3181	0.08705	(sampled)
-35.2295	3.48045	-19.1822	0.09034	(mid-point)
-35.1045	3.38541	-19.0464	0.09381	(sampled)
-34.9795	3.29144	-18.9115	0.09748	(mid-point)
-34.8545	3.19848	-18.7767	0.10137	(sampled)
-34.7295	3.10757	-18.6428	0.10549	(mid-point)
-34.6045	3.01818	-18.5088	0.10986	(sampled)
-34.4795	2.93151	-18.3746	0.11449	(mid-point)
-34.3545	2.84717	-18.2403	0.1194	(sampled)
-34.2295	2.76606	-18.1059	0.1246	(mid-point)
-34.1045	2.68745	-17.9715	0.13011	(sampled)
-33.9795	2.61065	-17.8374	0.13595	(mid-point)
-33.8545	2.53658	-17.7033	0.14213	(sampled)
-33.7295	2.46783	-17.5683	0.14866	(mid-point)
-33.6045	2.3998	-17.4332	0.15557	(sampled)
-33.4795	2.33658	-17.2993	0.16286	(mid-point)
-33.3545	2.27691	-17.1653	0.17053	(sampled)
-33.2295	2.22012	-17.0313	0.17861	(mid-point)
-33.1045	2.16681	-16.8973	0.18708	(sampled)
-32.9795	2.11957	-16.7625	0.19594	(mid-point)
-32.8545	2.0751	-16.6277	0.20518	(sampled)
-32.7295	2.03389	-16.4922	0.2148	(mid-point)
-32.6045	1.99725	-16.3568	0.22477	(sampled)
-32.4795	1.96742	-16.2237	0.23505	(mid-point)
-32.3545	1.94172	-16.0907	0.2456	(sampled)
-32.2295	1.92126	-15.9562	0.25638	(mid-point)
-32.1045	1.90576	-15.8217	0.26734	(sampled)
-31.9795	1.89508	-15.6874	0.27842	(mid-point)
-31.8545	1.88873	-15.5531	0.28957	(sampled)
-31.7295	1.88762	-15.4186	0.30074	(mid-point)
-31.6045	1.89163	-15.284	0.31186	(sampled)
-31.4795	1.90135	-15.1502	0.32286	(mid-point)
-31.3545	1.91594	-15.0164	0.3337	(sampled)
-31.2295	1.93444	-14.8813	0.34434	(mid-point)
-31.1045	1.95778	-14.7462	0.35472	(sampled)
-30.9795	1.98607	-14.6127	0.3648	(mid-point)
-30.8545	2.01902	-14.4791	0.37457	(sampled)
-30.7295	2.05761	-14.3427	0.38396	(mid-point)
-30.6045	2.10033	-14.2064	0.39298	(sampled)
-30.4795	2.14848	-14.0734	0.4016	(mid-point)
-30.3545	2.20019	-13.9405	0.40982	(sampled)
-30.2295	2.25513	-13.8064	0.41765	(mid-point)
-30.1045	2.31386	-13.6722	0.42508	(sampled)
-29.9795	2.37479	-13.5384	0.43213	(mid-point)
-29.8545	2.4392	-13.4045	0.43882	(sampled)
-29.7295	2.50706	-13.2701	0.44515	(mid-point)
-29.6045	2.57811	-13.1357	0.45114	(sampled)
-29.4795	2.60228	-12.9894	0.45701	(mid-point)
-29.3545	2.63027	-12.8431	0.46276	(sampled)
-29.2295	2.58878	-12.71	0.4687	(mid-point)
-29.1045	2.54905	-12.577	0.47482	(sampled)
-28.9795	2.5153	-12.4411	0.48111	(mid-point)
-28.8545	2.48428	-12.3051	0.48756	(sampled)
-28.7295	2.45879	-12.172	0.49414	(mid-point)
-28.6045	2.43687	-12.0389	0.50084	(sampled)
-28.4795	2.41959	-11.9042	0.50764	(mid-point)
-28.3545	2.40609	-11.7696	0.51451	(sampled)
-28.2295	2.39636	-11.6344	0.52144	(mid-point)
-28.1045	2.39112	-11.4993	0.5284	(sampled)
-27.9795	2.39146	-11.3664	0.53536	(mid-point)
-27.8545	2.39617	-11.2335	0.54229	(sampled)
-27.7295	2.40531	-11.0978	0.54916	(mid-point)
-27.6045	2.41896	-10.9622	0.55596	(sampled)
-27.4795	2.43679	-10.8282	0.56266	(mid-point)
-27.3545	2.45886	-10.6942	0.56925	(sampled)
-27.2295	2.48549	-10.5604	0.57569	(mid-point)
-27.1045	2.51607	-10.4267	0.58197	(sampled)
-26.9795	2.55041	-10.2926	0.58809	(mid-point)
-26.8545	2.58871	-10.1585	0.59403	(sampled)
-26.7295	2.63022	-10.0234	0.59978	(mid-point)
-26.6045	2.67555	-9.88822	0.60534	(sampled)
-26.4795	2.72607	-9.75464	0.61069	(mid-point)
-26.3545	2.77988	-9.62106	0.61584	(sampled)
-26.2295	2.83592	-9.48577	0.62079	(mid-point)
-26.1045	2.8953	-9.35048	0.62553	(sampled)
-25.9795	2.95898	-9.21758	0.63008	(mid-point)
-25.8545	3.02517	-9.08468	0.63442	(sampled)
-25.7295	3.08085	-8.92461	0.63862	(mid-point)
-25.6045	3.13698	-8.76455	0.64266	(sampled)
-25.4795	3.17107	-8.62818	0.64662	(mid-point)
-25.3545	3.20844	-8.49181	0.65048	(sampled)
-25.2295	3.24884	-8.35828	0.65425	(mid-point)
-25.1045	3.29224	-8.22476	0.65792	(sampled)
-24.9795	3.33954	-8.09033	0.66149	(mid-point)
-24.8545	3.38846	-7.9559	0.66495	(sampled)
-24.7295	3.44111	-7.82054	0.66832	(mid-point)
-24.6045	3.49513	-7.68517	0.67157	(sampled)
-24.4795	3.5545	-7.55149	0.67472	(mid-point)
-24.3545	3.615	-7.4178	0.67777	(sampled)
-24.2295	3.67883	-7.2835	0.68071	(mid-point)
-24.1045	3.74475	-7.1492	0.68354	(sampled)
-23.9795	3.81325	-7.01516	0.68628	(mid-point)
-23.8545	3.88231	-6.88112	0.68892	(sampled)
-23.7295	3.95328	-6.74866	0.69147	(mid-point)
-23.6045	4.02638	-6.6162	0.69392	(sampled)
-23.4795	4.1012	-6.48388	0.69629	(mid-point)
-23.3545	4.17744	-6.35156	0.69857	(sampled)
-23.2295	4.25625	-6.21845	0.70076	(mid-point)
-23.1045	4.3367	-6.08534	0.70288	(sampled)
-22.9795	4.41946	-5.95137	0.70491	(mid-point)
-22.8545	4.50336	-5.8174	0.70688	(sampled)
-22.7295	4.58924	-5.68428	0.70877	(mid-point)
-22.6045	4.67671	-5.55117	0.71058	(sampled)
-22.4795	4.73329	-5.38275	0.71236	(mid-point)
-22.3545	4.75921	-5.21434	0.71412	(sampled)
-22.2295	4.77315	-5.07864	0.71586	(mid-point)
-22.1045	4.78887	-4.94294	0.7176	(sampled)
-21.9795	4.80783	-4.80699	0.71932	(mid-point)
-21.8545	4.82959	-4.67105	0.72103	(sampled)
-21.7295	4.85308	-4.53393	0.72272	(mid-point)
-21.6045	4.87925	-4.39682	0.72439	(sampled)
-21.4795	4.9087	-4.26327	0.72604	(mid-point)
-21.3545	4.94036	-4.12971	0.72767	(sampled)
-21.2295	4.971	-3.99761	0.72928	(mid-point)
-21.1045	5.00407	-3.8655	0.73087	(sampled)
-20.9795	5.03926	-3.73201	0.73243	(mid-point)
-20.8545	5.07573	-3.59851	0.73398	(sampled)
-20.7295	5.04553	-3.43514	0.73554	(mid-point)
-20.6045	5.01715	-3.27176	0.73712	(sampled)
-20.4795	4.99037	-3.11344	0.73872	(mid-point)
-20.3545	4.96521	-2.95512	0.74033	(sampled)
-20.2295	4.91322	-2.82062	0.74198	(mid-point)
-20.1045	4.86353	-2.68612	0.74366	(sampled)
-19.9795	4.81578	-2.55164	0.74538	(mid-point)
-19.8545	4.77024	-2.41716	0.74713	(sampled)
-19.7295	4.72797	-2.28299	0.74891	(mid-point)
-19.6045	4.68818	-2.14882	0.75072	(sampled)
-19.4795	4.65001	-2.01559	0.75256	(mid-point)
-19.3545	4.61398	-1.88235	0.75443	(sampled)
-19.2295	4.58234	-1.74729	0.75632	(mid-point)
-19.1045	4.55339	-1.61224	0.75824	(sampled)
-18.9795	4.52546	-1.479	0.76018	(mid-point)
-18.8545	4.50008	-1.34577	0.76215	(sampled)
-18.7295	4.4791	-1.21043	0.76413	(mid-point)
-18.6045	4.46096	-1.07509	0.76613	(sampled)
-18.4795	4.44494	-0.94095	0.76815	(mid-point)
-18.3545	4.43174	-0.8068	0.77017	(sampled)
-18.2295	4.42195	-0.67186	0.77221	(mid-point)
-18.1045	4.41506	-0.53693	0.77425	(sampled)
-17.9795	4.41031	-0.40261	0.77629	(mid-point)
-17.8545	4.40832	-0.26829	0.77834	(sampled)
-17.7295	4.40959	-0.13415	0.78039	(mid-point)
-17.6045	4.41351	0	0.78243	(sampled)
-17.4795	4.42073	0.13418	0.78447	(mid-point)
-17.3545	4.43061	0.26835	0.78649	(sampled)
-17.2295	4.44313	0.40273	0.78851	(mid-point)
-17.1045	4.4583	0.5371	0.79051	(sampled)
-16.9795	4.4764	0.67133	0.7925	(mid-point)
-16.8545	4.49729	0.80555	0.79446	(sampled)
-16.7295	4.52172	0.93968	0.79641	(mid-point)
-16.6045	4.54733	1.07381	0.79833	(sampled)
-16.4795	4.5773	1.20796	0.80023	(mid-point)
-16.3545	4.60838	1.3421	0.80211	(sampled)
-16.2295	4.64397	1.47687	0.80395	(mid-point)
-16.1045	4.68185	1.61163	0.80577	(sampled)
-15.9795	4.72138	1.74574	0.80755	(mid-point)
-15.8545	4.76311	1.87984	0.8093	(sampled)
-15.7295	4.80755	2.01463	0.81103	(mid-point)
-15.6045	4.85347	2.14941	0.81272	(sampled)
-15.4795	4.9033	2.28379	0.81437	(mid-point)
-15.3545	4.95543	2.41816	0.81599	(sampled)
-15.2295	5.00861	2.55262	0.81758	(mid-point)
-15.1045	5.06399	2.68708	0.81913	(sampled)
-14.9795	5.10303	2.84086	0.82066	(mid-point)
-14.8545	5.14436	2.99463	0.82216	(sampled)
-14.7295	5.11215	3.16785	0.82368	(mid-point)
-14.6045	5.08303	3.34106	0.82522	(sampled)
-14.4795	5.04365	3.47276	0.82679	(mid-point)
-14.3545	5.00657	3.60446	0.82837	(sampled)
-14.2295	4.97202	3.73678	0.82998	(mid-point)
-14.1045	4.93987	3.8691	0.83161	(sampled)
-13.9795	4.91139	4.00367	0.83326	(mid-point)
-13.8545	4.88503	4.13824	0.83493	(sampled)
-13.7295	4.86096	4.2711	0.83661	(mid-point)
-13.6045	4.8392	4.40396	0.83831	(sampled)
-13.4795	4.82008	4.5354	0.84003	(mid-point)
-13.3545	4.80245	4.66685	0.84175	(sampled)
-13.2295	4.78865	4.80019	0.84349	(mid-point)
-13.1045	4.77739	4.93353	0.84523	(sampled)
-12.9795	4.76889	5.06595	0.84698	(mid-point)
-12.8545	4.76251	5.19837	0.84873	(sampled)
-12.7295	4.75987	5.3321	0.85049	(mid-point)
-12.6045	4.75993	5.46583	0.85225	(sampled)
-12.4795	4.76087	5.59937	0.854	(mid-point)
-12.3545	4.76383	5.73291	0.85575	(sampled)
-12.2295	4.77253	5.86543	0.8575	(mid-point)
-12.1045	4.7837	5.99795	0.85924	(sampled)
-11.9795	4.79718	6.13033	0.86097	(mid-point)
-11.8545	4.81203	6.26271	0.86269	(sampled)
-11.7295	4.82939	6.3961	0.86439	(mid-point)
-11.6045	4.84937	6.52949	0.86609	(sampled)
-11.4795	4.87229	6.66201	0.86776	(mid-point)
-11.3545	4.89772	6.79453	0.86942	(sampled)
-11.2295	4.92566	6.92787	0.87106	(mid-point)
-11.1045	4.95609	7.0612	0.87268	(sampled)
-10.9795	4.98904	7.19383	0.87428	(mid-point)
-10.8545	5.02439	7.32646	0.87585	(sampled)
-10.7295	5.06325	7.45864	0.87741	(mid-point)
-10.6045	5.10238	7.59081	0.87894	(sampled)
-10.4795	5.14522	7.72374	0.88044	(mid-point)
-10.3545	5.1903	7.85667	0.88192	(sampled)
-10.2295	5.23625	7.99105	0.88337	(mid-point)
-10.1045	5.28319	8.12542	0.88479	(sampled)
-9.9795	5.33638	8.25634	0.88619	(mid-point)
-9.8545	5.38895	8.38725	0.88756	(sampled)
-9.7295	5.44448	8.52029	0.8889	(mid-point)
-9.6045	5.50169	8.65334	0.89022	(sampled)
-9.4795	5.56158	8.788	0.8915	(mid-point)
-9.3545	5.62085	8.92267	0.89276	(sampled)
-9.2295	5.68469	9.0547	0.89399	(mid-point)
-9.1045	5.75028	9.18673	0.8952	(sampled)
-8.9795	5.81558	9.31809	0.89637	(mid-point)
-8.8545	5.88231	9.44946	0.89752	(sampled)
-8.7295	5.95349	9.58498	0.89865	(mid-point)
-8.6045	6.02481	9.7205	0.89974	(sampled)
-8.4795	6.09859	9.85198	0.90081	(mid-point)
-8.3545	6.17299	9.98345	0.90186	(sampled)
-8.2295	6.2495	10.117	0.90287	(mid-point)
-8.1045	6.32747	10.2505	0.90387	(sampled)
-7.9795	6.40627	10.3834	0.90484	(mid-point)
-7.8545	6.48645	10.5162	0.90578	(sampled)
-7.7295	6.56631	10.6514	0.90671	(mid-point)
-7.6045	6.64758	10.7866	0.90761	(sampled)
-7.4795	6.72863	10.9264	0.90849	(mid-point)
-7.3545	6.81117	11.0662	0.90934	(sampled)
-7.2295	6.83921	11.2117	0.91019	(mid-point)
-7.1045	6.86586	11.3572	0.91104	(sampled)
-6.9795	6.79072	11.5427	0.9119	(mid-point)
-6.8545	6.71842	11.7282	0.91278	(sampled)
-6.7295	6.64154	11.8641	0.91368	(mid-point)
-6.6045	6.56477	12	0.91461	(sampled)
-6.4795	6.49249	12.1317	0.91555	(mid-point)
-6.3545	6.42026	12.2633	0.91652	(sampled)
-6.2295	6.36359	12.5114	0.9175	(mid-point)
-6.1045	6.31314	12.7594	0.9185	(sampled)
-5.9795	6.25122	12.8954	0.91952	(mid-point)
-5.8545	6.19064	13.0314	0.92055	(sampled)
-5.7295	6.13276	13.1695	0.92161	(mid-point)
-5.6045	6.07689	13.3076	0.92269	(sampled)
-5.4795	6.01849	13.4362	0.92379	(mid-point)
-5.3545	5.96179	13.5648	0.92491	(sampled)
-5.2295	5.91561	13.7149	0.92604	(mid-point)
-5.1045	5.87211	13.8651	0.9272	(sampled)
-4.9795	5.82652	14.0029	0.92837	(mid-point)
-4.8545	5.78317	14.1408	0.92956	(sampled)
-4.7295	5.72642	14.2693	0.93077	(mid-point)
-4.6045	5.67059	14.3978	0.93201	(sampled)
-4.4795	5.61417	14.5486	0.93327	(mid-point)
-4.3545	5.56037	14.6994	0.93456	(sampled)
-4.2295	5.50821	14.8385	0.93587	(mid-point)
-4.1045	5.45832	14.9776	0.93721	(sampled)
-3.9795	5.34096	16.1317	0.9386	(mid-point)
-3.8545	5.40721	17.2858	0.93996	(sampled)
-3.7295	5.36241	17.418	0.94135	(mid-point)
-3.6045	5.31932	17.5502	0.94275	(sampled)
-3.4795	5.31579	17.742	0.94416	(mid-point)
-3.3545	5.30889	17.9337	0.94557	(sampled)
-3.2295	5.29426	18.0687	0.94699	(mid-point)
-3.1045	5.28192	18.2038	0.94842	(sampled)
-2.9795	5.27044	18.3401	0.94985	(mid-point)
-2.8545	5.26133	18.4764	0.95129	(sampled)
-2.7295	5.25469	18.6118	0.95273	(mid-point)
-2.6045	5.25045	18.7473	0.95417	(sampled)
-2.4795	5.24869	18.8828	0.95562	(mid-point)
-2.3545	5.24954	19.0184	0.95706	(sampled)
-2.2295	5.25394	19.1549	0.9585	(mid-point)
-2.1045	5.26042	19.2914	0.95994	(sampled)
-1.9795	5.26864	19.4286	0.96137	(mid-point)
-1.8545	5.27942	19.5658	0.9628	(sampled)
-1.7295	5.29415	19.6992	0.96422	(mid-point)
-1.6045	5.31136	19.8326	0.96563	(sampled)
-1.4795	5.33186	19.9688	0.96703	(mid-point)
-1.3545	5.35354	20.1051	0.96842	(sampled)
-1.2295	5.37863	20.2421	0.96979	(mid-point)
-1.1045	5.40437	20.3791	0.97116	(sampled)
-0.9795	5.43423	20.5139	0.9725	(mid-point)
-0.8545	5.46585	20.6487	0.97383	(sampled)
-0.7295	5.50118	20.7845	0.97515	(mid-point)
-0.6045	5.53534	20.9204	0.97645	(sampled)
-0.4795	5.57547	21.0555	0.97773	(mid-point)
-0.3545	5.61787	21.1905	0.97899	(sampled)
-0.2295	5.66112	21.3269	0.98023	(mid-point)
-0.1045	5.70662	21.4633	0.98145	(sampled)
0.0205	5.75521	21.5985	0.98265	(mid-point)
0.1455	5.80497	21.7336	0.98383	(sampled)
0.2705	5.85697	21.8695	0.98499	(mid-point)
0.3955	5.91103	22.0053	0.98613	(sampled)
0.5205	5.96737	22.1416	0.98725	(mid-point)
0.6455	6.02567	22.2779	0.98835	(sampled)
0.7705	6.07941	22.4254	0.98942	(mid-point)
0.8955	6.13524	22.5729	0.99048	(sampled)
1.0205	6.20531	22.7023	0.99151	(mid-point)
1.1455	6.27575	22.8318	0.99252	(sampled)
1.2705	6.34262	22.9675	0.99351	(mid-point)
1.3955	6.41119	23.1033	0.99448	(sampled)
1.5205	6.4778	23.2582	0.99543	(mid-point)
1.6455	6.54677	23.413	0.99636	(sampled)
1.7705	6.6248	23.5401	0.99726	(mid-point)
1.8955	6.70402	23.667	0.99815	(sampled)
2.0205	6.75679	24.37	0.99902	(mid-point)
2.1455	6.86678	25.073	0.99986	(sampled)
2.2705	6.95427	25.2024	1.00069	(mid-point)
2.3955	7.04223	25.3319	1.00149	(sampled)
2.5205	7.12748	25.4594	1.00227	(mid-point)
2.6455	7.21318	25.5869	1.00304	(sampled)
2.7705	7.30192	25.7128	1.00378	(mid-point)
2.8955	7.38706	25.8387	1.00451	(sampled)
3.0205	7.48151	25.9777	1.00522	(mid-point)
3.1455	7.57708	26.1168	1.00592	(sampled)
3.2705	7.6692	26.2447	1.00659	(mid-point)
3.3955	7.76214	26.3727	1.00725	(sampled)
3.5205	7.85381	26.499	1.0079	(mid-point)
3.6455	7.94625	26.6253	1.00853	(sampled)
3.7705	8.04359	26.7597	1.00914	(mid-point)
3.8955	8.1418	26.8941	1.00974	(sampled)
4.0205	8.23992	27.0222	1.01033	(mid-point)
4.1455	8.33763	27.1503	1.0109	(sampled)
4.2705	8.435	27.2769	1.01146	(mid-point)
4.3955	8.53194	27.4034	1.01201	(sampled)
4.5205	8.63308	27.5347	1.01254	(mid-point)
4.6455	8.7349	27.6659	1.01306	(sampled)
4.7705	8.8364	27.7944	1.01357	(mid-point)
4.8955	8.93724	27.9229	1.01407	(sampled)
5.0205	9.03914	28.0511	1.01456	(mid-point)
5.1455	9.14132	28.1793	1.01503	(sampled)
5.2705	9.24444	28.3065	1.0155	(mid-point)
5.3955	9.34803	28.4337	1.01595	(sampled)
5.5205	9.45182	28.5614	1.0164	(mid-point)
5.6455	9.55611	28.6892	1.01684	(sampled)
5.7705	9.66186	28.8183	1.01726	(mid-point)
5.8955	9.768	28.9475	1.01768	(sampled)
6.0205	9.87417	29.0759	1.01809	(mid-point)
6.1455	9.98064	29.2042	1.01849	(sampled)
